# Supplementary material for: Identification of pathogens from native urine samples by MALDI-TOF/TOF tandem mass spectrometry
Source: Clin Proteomics. 2020 Jun 23;17:25. doi: 10.1186/s12014-020-09289-4 (PMC7310424; doi:10.1186/s12014-020-09289-4)
Supplement: Supplementary file 3 — Additional file 3: Excel tables. [file 12014_2020_9289_MOESM3_ESM.xlsx]

## Sheet: Bacterial proteins
			Supporting information data
			Supplementary Excel tables
			Bacterial proteins
	N.o .	Acession	Description	Mascot protein score	Σ Score	MW (Da)	N.o. (peptide)
UR1	1	YP_002920498.1	outer membrane porin protein C	328, 328, 87, 87	830	40008	4	Klebsiella pneumoniae subsp. pneumoniae NTUH-K2044
	2	YP_001335792.1	murein lipoprotein	233, 100, 75, 75	483	8381	4	Klebsiella pneumoniae subsp. pneumoniae MGH 78578
	3	ACM07444.1	OmpK36 porin		274	39854	1	Klebsiella pneumoniae
	4	1006243A	lipoprotein mutant		233	8265	1	Escherichia coli
	5	YP_001334652.1	outer membrane protein A	139, 64	203	38021	2	Klebsiella pneumoniae subsp. pneumoniae MGH 78578
	6	WP_004133882.1	outer membrane porin protein C		198	40676	1	Klebsiella oxytoca
	7	WP_016189672.1	pyruvate formate-lyase		147	85234	1	Erwinia tracheiphila
	8	YP_001334597.1	formate acetyltransferase 1		144	85092	1	Klebsiella pneumoniae subsp. pneumoniae MGH 78578
	9	2K0L_A	Chain A, Nmr Structure Of The Transmembrane Domain Of The Outer Membrane Protein A From Klebsiella Pneumoniae In Dhpc Micelles		141	23355	1	Klebsiella pneumoniae
	10	YP_007872516.1	outer membrane porin protein C		133	40486	1	Raoultella ornithinolytica B6
	11	WP_016809062.1	outer membrane porin protein C		102	/	1	Klebsiella oxytoca
	12	P02938.1	RecName: Full=Major outer membrane lipoprotein; AltName: Full=Murein-lipoprotein; Flags: Precursor		100	8234	1	Serratia marcescens
	13	AAD32649.1	EF-Tu		96	39423	1	Coxiella burnetii
	14	YP_007504946.1	Pyruvate formate-lyase		93	85227	1	Morganella morganii subsp. morganii KT
	15	WP_006820044.1	outer membrane porin protein C		77	/	1	Yokenella regensburgei
	16	WP_006707774.1	murein lipoprotein		75	8805	1	Candidatus Regiella insecticola
	17	ABS84845.1	translation elongation factor Tu		73	21970	1	Bacillus subtilis subsp. spizizenii ATCC 6633
	18	NP_872680.1	elongation factor Tu		73	43400	1	Haemophilus ducreyi 35000HP
	19	NP_299905.1	elongation factor Tu		70	42849	1	Xylella fastidiosa 9a5c
	20	YP_001453698.1	outer membrane protein F		67	/	1	Citrobacter koseri ATCC BAA-895
	21	NP_667815.1	elongation factor Tu		67	/	1	Yersinia pestis KIM10+
	22	P09146.1	RecName: Full=Outer membrane protein A; Flags: Precursor		67	37552	1	Klebsiella aerogenes
	23	YP_003755150.1	translation elongation factor Tu		65	/	1	Hyphomicrobium denitrificans ATCC 51888
	24	YP_001334418.1	peptidoglycan-associated outer membrane lipoprotein		64	18851	1	Klebsiella pneumoniae subsp. pneumoniae MGH 78578
	25	YP_004393584.1	major outer membrane protein OmpAII		64	/	1	Aeromonas veronii B565
	26	NP_455305.1	peptidoglycan-associated lipoprotein		64	18853	1	Salmonella enterica subsp. enterica serovar Typhi str. CT18
	27	NP_669338.1	bifunctional acetaldehyde-CoA/alcohol dehydrogenase		64	96527	1	Yersinia pestis KIM10+
	28	YP_001335857.1	bifunctional acetaldehyde-CoA/alcohol dehydrogenase		62	95834	1	Klebsiella pneumoniae subsp. pneumoniae MGH 78578
UR2	1	YP_001338507.1	molecular chaperone (small heat shock protein)	183, 115, 74	372	21493	3	Klebsiella pneumoniae subsp. pneumoniae MGH 78578
	2	YP_001335792.1	murein lipoprotein	227, 62	289	8381	2	Klebsiella pneumoniae subsp. pneumoniae MGH 78578
	3	WP_000350438.1	heat shock protein Hsp20	180, 73	253	21465	2	Escherichia coli
	4	1006243A	lipoprotein mutant		227	8265	1	Escherichia coli
	5	WP_004103993.1	outer membrane porin protein C		196	40047	1	Klebsiella oxytoca
	6	EWF64901.1	outer membrane protein C		185	40621	1	Klebsiella oxytoca MGH 41
	7	WP_004133882.1	outer membrane porin protein C		174	40676	1	Klebsiella oxytoca
	8	YP_002920498.1	outer membrane porin protein C		159	40008	1	Klebsiella pneumoniae subsp. pneumoniae NTUH-K2044
	9	YP_005018909.1	peptidoglycan-associated outer membrane lipoprotein		116	18833	1	Klebsiella oxytoca KCTC 1686
	10	WP_016809062.1	outer membrane porin protein C		110	41545	1	Klebsiella oxytoca
	11	YP_001334652.1	outer membrane protein A		98	38021	1	Klebsiella pneumoniae subsp. pneumoniae MGH 78578
	12	P09146.1	RecName: Full=Outer membrane protein A; Flags: Precursor		98	37552	1	Klebsiella aerogenes
	13	YP_004393584.1	major outer membrane protein OmpAII		95	/	1	Aeromonas veronii B565
	14	ABM66811.1	OmpE36		86	40538	1	Enterobacter aerogenes
	15	WP_006820044.1	outer membrane porin protein C		81	40792	1	Yokenella regensburgei
	16	YP_005016763.1	hypothetical protein KOX_03925		76	15018	1	Klebsiella oxytoca KCTC 1686
	17	YP_001175110.1	30S ribosomal protein S6		74	15096	1	Enterobacter sp. 638
	18	AAL56004.1	GroEL		73	52000	1	Escherichia coli
	19	YP_001453698.1	outer membrane protein F		70	/	1	Citrobacter koseri ATCC BAA-895
	20	YP_004517370.1	thioredoxin		65	11419	1	Desulfotomaculum kuznetsovii DSM 6115
	21	YP_960652.1	heat shock protein Hsp20		62	21458	1	Marinobacter aquaeolei VT8
	22	P02938.1	RecName: Full=Major outer membrane lipoprotein; AltName: Full=Murein-lipoprotein; Flags: Precursor		62	8234	1	Serratia marcescens
UR3	1	YP_001335857.1	bifunctional acetaldehyde-CoA/alcohol dehydrogenase	118, 118, 72	308	95834	3	Klebsiella pneumoniae subsp. pneumoniae MGH 78578
	2	YP_001335792.1	murein lipoprotein		187	8381	1	Klebsiella pneumoniae subsp. pneumoniae MGH 78578
	3	1006243A	lipoprotein mutant		187	8265	1	Escherichia coli
	4	WP_006777698.1	major outer membrane lipoprotein		142	11702	1	Salmonella enterica
	5	YP_001177024.1	bifunctional acetaldehyde-CoA/alcohol dehydrogenase		74	96203	1	Enterobacter sp. 638
	6	ERE53009.1	30S ribosomal protein S2, partial		67	25562	1	Enterococcus gallinarum EGD-AAK12
	7	BAA32342.1	ribosomal protein S2		67	31289	1	Pseudomonas aeruginosa
	8	YP_001334860.1	glyceraldehyde-3-phosphate dehydrogenase		65	35449	1	Klebsiella pneumoniae subsp. pneumoniae MGH 78578
	9	YP_007344897.1	alcohol dehydrogenase, class IV		64	95701	1	Serratia marcescens FGI94
UR4	1	WP_004244438.1	peptidoglycan-associated outer membrane lipoprotein		263	19482	1	Proteus mirabilis
	2	YP_002150530.1	outer membrane porin	116, 69	185	40796	2	Proteus mirabilis HI4320
	3	YP_002150547.1	outer membrane protein A	77, 69	146	38994	2	Proteus mirabilis HI4320
	4	WP_017827341.1	outer membrane porin protein C		106	41648	1	Proteus mirabilis
	5	YP_001334418.1	peptidoglycan-associated outer membrane lipoprotein		89	18851	1	Klebsiella pneumoniae subsp. pneumoniae MGH 78578
	6	NP_455305.1	peptidoglycan-associated lipoprotein		89	18853	1	Salmonella enterica subsp. enterica serovar Typhi str. CT18
	7	YP_002987255.1	porin Gram-negative type		71	39618	1	Dickeya dadantii Ech703
	8	WP_022633981.1	Outer membrane porin 1a (Ia,b,F)		69	40140	1	Dickeya
	9	WP_004256113.1	membrane protein		69	39141	1	Providencia rettgeri
	10	ADO64273.1	porin 1		69	41193	1	Providencia stuartii
UR5	1	NP_815088.1	cold-shock domain-contain protein	121, 77, 69	267	7181	3	Enterococcus faecalis V583
	2	NP_814901.1	50S ribosomal protein L31	179, 61	240	10119	2	Enterococcus faecalis V583
	3	NP_814526.1	cold shock domain-contain protein		136	7109	1	Enterococcus faecalis V583
	4	NP_814417.1	hypothetical protein EF0665		132	6666	2	Enterococcus faecalis V583
	5	BAI53110.1	elongation factor Tu		91	28690	1	Carnobacterium maltaromaticum
	6	AAF17305.1	putative elongation factor Tu		91	27433	1	Enterococcus avium ATCC 14025
	7	ABS84849.1	translation elongation factor Tu		91	21843	1	Serratia rubidaea
	8	NP_814237.1	OsmC/Ohr family protein		90	14371	1	Enterococcus faecalis V583
	9	WP_016173398.1	general stress protein		86	22194	1	Enterococcus dispar
	10	NP_813885.1	gls24 protein		86	20540	1	Enterococcus faecalis V583
	11	NP_267752.1	50S ribosomal protein L31		83	/	1	Lactococcus lactis subsp. lactis Il1403
	12	EUJ37103.1	cold-shock DNA-binding domain-containing protein		74	7459	1	Brochothrix thermosphacta DSM 20171 = FSL F6-1036
	13	WP_010765440.1	hypothetical protein		70	7260	1	Enterococcus moraviensis
	14	EUK53620.1	50S ribosomal protein L31 type B		68	/	1	Staphylococcus aureus M0180
	15	NP_372644.1	50S ribosomal protein L31		68	/	1	Staphylococcus aureus subsp. aureus Mu50
	16	NP_815637.1	enolase		67	46482	1	Enterococcus faecalis V583
	17	NP_816504.1	acyl carrier protein		67	8610	1	Enterococcus faecalis V583
	18	NP_816831.1	Dps family protein		67	17877	1	Enterococcus faecalis V583
	19	WP_002568043.1	cold shock protein		66	7270	1	Clostridium
	20	WP_002586010.1	cold-shock protein		66	7305	1	Clostridium
UR6	1	NP_814526.1	cold-shock DNA-binding domain-containing protein	128, 128, 128, 113	497	7109	4	Enterococcus faecalis V583
	2	NP_815088.1	cold-shock domain-contain protein	71, 71	142	7181	2	Enterococcus faecalis V583
	3	AAC80242.1	major cold-shock protein, partial		88	4967	1	Enterococcus faecalis
UR7	1	P24016.1	RecName: Full=Outer membrane protein A; AltName: Full=Outer membrane protein II	139, 78, 66	283	25648	3	Citrobacter freundii
	2	YP_001335792.1	murein lipoprotein		208	8381	1	Klebsiella pneumoniae subsp. pneumoniae MGH 78578
	3	1006243A	lipoprotein mutant		208	8265	1	Escherichia coli
	4	YP_049963.1	major outer membrane lipoprotein		148	8396	1	Pectobacterium atrosepticum SCRI1043
	5	AHF77098.1	Major outer membrane lipoprotein		148	8327	1	Sodalis sp. HS1
	6	WP_007664753.1	Outer membrane protein A precursor		113	38294	1	Cronobacter condimenti
	7	AAA24807.1	outer membrane protein II, partial		113	25538	1	Enterobacter aerogenes
	8	ERE53009.1	30S ribosomal protein S2, partial		72	25562	1	Enterococcus gallinarum EGD-AAK12
	9	BAA32342.1	ribosomal protein S2		72	31289	1	Pseudomonas aeruginosa
UR8	1	P24016.1	RecName: Full=Outer membrane protein A; AltName: Full=Outer membrane protein II	185, 104, 102	391	25648	3	Citrobacter freundii
	2	YP_001335792.1	murein lipoprotein	204, 86	290	8381	2	Klebsiella pneumoniae subsp. pneumoniae MGH 78578
	3	YP_001452149.1	outer membrane porin protein C	174, 68	242	40804	2	Citrobacter koseri ATCC BAA-895
	4	1006243A	lipoprotein mutant		204	8265	1	Escherichia coli
	5	YP_001334418.1	peptidoglycan-associated outer membrane lipoprotein	88, 77	165	18851	2	Klebsiella pneumoniae subsp. pneumoniae MGH 78578
	6	YP_001337990.1	50S ribosomal protein L7/L12		163	12334	1	Klebsiella pneumoniae subsp. pneumoniae MGH 78578
	7	NP_290617.1	50S ribosomal protein L7/L12		163	12288	1	Escherichia coli O157:H7 str. EDL933
	8	WP_002438624.1	50S ribosomal protein L7/L12		151	12334	1	Escherichia hermannii
	9	YP_049963.1	major outer membrane lipoprotein		146	8396	1	Pectobacterium atrosepticum SCRI1043
	10	AHF77098.1	Major outer membrane lipoprotein		146	8327	1	Sodalis sp. HS1
	11	WP_002438592.1	outer membrane phosphoporin protein E		143	38178	1	Escherichia hermannii
	12	WP_023490706.1	50S ribosomal protein L7/L12		139	12320	1	Serratia sp. DD3
	13	YP_001453952.1	peptidoglycan-associated outer membrane lipoprotein		132	18655	1	Citrobacter koseri ATCC BAA-895
	14	YP_001570436.1	hypothetical protein SARI_01396		124	41232	1	Salmonella enterica subsp. arizonae serovar 62:z4,z23:- str. RSK2980
	15	NP_456260.1	heat shock protein		113	17671	1	Salmonella enterica subsp. enterica serovar Typhi str. CT18
	16	YP_005196338.1	outer membrane pore protein F		112	/	1	Pantoea ananatis LMG 5342
	17	AAQ96078.1	outer membrane protein II		108	17424	1	Hafnia alvei
	18	YP_001455345.1	hypothetical protein CKO_03833		106	85023	1	Citrobacter koseri ATCC BAA-895
	19	ERE43463.1	alkyl hydroperoxide reductase subunit C, partial		91	20509	1	Enterococcus gallinarum EGD-AAK12
	20	NP_455184.1	alkyl hydroperoxide reductase c22 protein		91	20734	1	Salmonella enterica subsp. enterica serovar Typhi str. CT18
	21	NP_455305.1	peptidoglycan-associated lipoprotein		88	18853	1	Salmonella enterica subsp. enterica serovar Typhi str. CT18
	22	ADK27722.1	outer membrane protein F		86	/	1	Yersinia aldovae
	23	P02938.1	RecName: Full=Major outer membrane lipoprotein; AltName: Full=Murein-lipoprotein; Flags: Precursor		86	8234	1	Serratia marcescens
	24	YP_003883508.1	outer membrane protein F		85	39421	1	Dickeya dadantii 3937
	25	YP_001336542.1	autonomous glycyl radical cofactor GrcA		84	14234	1	Klebsiella pneumoniae subsp. pneumoniae MGH 78578
	26	P18953.2	RecName: Full=Autonomous glycyl radical cofactor		84	14366	1	Serratia liquefaciens
	27	NP_460044.1	outer membrane protein A		83	37492	1	Salmonella enterica subsp. enterica serovar Typhimurium str. LT2
	28	YP_001175971.1	peptidoglycan-associated outer membrane lipoprotein		79	18801	1	Enterobacter sp. 638
	29	YP_538610.1	hypothetical protein UTI89_P011		79	19211	1	Escherichia coli UTI89
	30	YP_001454596.1	hypothetical protein CKO_03069		76	9501	1	Citrobacter koseri ATCC BAA-895
	31	WP_021542859.1	hypothetical protein		75	9376	1	Escherichia coli
	32	YP_004116947.1	enolase		74	45393	1	Pantoea sp. At-9b
	33	WP_006176733.1	autonomous glycyl radical cofactor GrcA		71	14432	1	Enterobacter
	34	NP_457121.1	autonomous glycyl radical cofactor GrcA		71	14335	1	Salmonella enterica subsp. enterica serovar Typhi str. CT18
	35	YP_001338188.1	RNA-binding protein Hfq		69	10996	1	Klebsiella pneumoniae subsp. pneumoniae MGH 78578
	36	AAA24175.1	ORF, partial		69	8848	1	Escherichia coli
	37	YP_006588965.1	RNA chaperone Hfq		69	11375	1	secondary endosymbiont of Heteropsylla cubana
	38	YP_454193.1	phosphopyruvate hydratase		68	45803	1	Sodalis glossinidius str. 'morsitans'
	39	EUD03787.1	outer membrane protein C		67	/	1	Providencia alcalifaciens RIMD 1656011
	40	WP_019677784.1	50S ribosomal protein L7/L12		67	12157	1	Rheinheimera perlucida
	41	1LR1_A	Chain A, Solution Structure Of The Oligomerization Domain Of The Bacterial Chromatin-Structuring Protein H-Ns		67	7005	1	Escherichia coli
	42	WP_024131942.1	membrane protein		65	37713	1	Salmonella enterica
	43	YP_001338154.1	chaperonin GroEL		64	57090	1	Klebsiella pneumoniae subsp. pneumoniae MGH 78578
	44	BAA25225.1	similar to GroEL protein		64	56351	1	Klebsiella pneumoniae
	45	ERE50858.1	outer membrane porin protein C		62	40831	1	Enterococcus gallinarum EGD-AAK12
	46	YP_001336754.1	phosphopyruvate hydratase		62	45521	1	Klebsiella pneumoniae subsp. pneumoniae MGH 78578
	47	YP_002932251.1	Gram-negative porin family protein		62	/	1	Edwardsiella ictaluri 93-146
	48	YP_001336083.1	outer membrane pore protein		62	/	1	Klebsiella pneumoniae subsp. pneumoniae MGH 78578
UR9	1	YP_002150354.1	peptidoglycan-associated outer membrane lipoprotein	203, 192, 159, 96	650	18118	4	Proteus mirabilis HI4320
	2	YP_001334418.1	peptidoglycan-associated outer membrane lipoprotein	108, 76	184	18851	2	Klebsiella pneumoniae subsp. pneumoniae MGH 78578
	3	AAB86977.1	peptidoglycan associated lipoprotein		76	6732	1	Allochromatium vinosum DSM 180
	4	YP_003147027.1	peptidoglycan-associated lipoprotein		76	19050	1	Kangiella koreensis DSM 16069
	5	WP_017628417.1	outer membrane porin protein C		74	41496	1	Proteus mirabilis
	6	NP_290617.1	50S ribosomal protein L7/L12		60	12288	1	Escherichia coli O157:H7 str. EDL933
	7	WP_017842506.1	peptidoglycan-associated lipoprotein		60	/	1	Methylomicrobium buryatense
	8	YP_048349.1	50S ribosomal protein L7/L12		60	12424	1	Pectobacterium atrosepticum SCRI1043
UR10	1	YP_002151979.1	DL-methionine transporter substrate-binding subunit		295	29682	2	Proteus mirabilis HI4320
	2	YP_002150354.1	peptidoglycan-associated outer membrane lipoprotein		225	18118	1	Proteus mirabilis HI4320
	3	YP_001334418.1	peptidoglycan-associated outer membrane lipoprotein		161	18851	2	Klebsiella pneumoniae subsp. pneumoniae MGH 78578
	4	YP_002150599.1	outer membrane receptor		160	73933	2	Proteus mirabilis HI4320
	5	P09461.1	RecName: Full=Major outer membrane lipoprotein; AltName: Full=Murein-lipoprotein; Flags: Precursor		119	8246	1	Proteus mirabilis
	6	NP_455305.1	peptidoglycan-associated lipoprotein		104	18853	1	Salmonella enterica subsp. enterica serovar Typhi str. CT18
	7	YP_051614.1	DL-methionine transporter substrate-binding subunit		73	29463	1	Pectobacterium atrosepticum SCRI1043
	8	YP_001333901.1	DL-methionine transporter substrate-binding subunit		72	29366	1	Klebsiella pneumoniae subsp. pneumoniae MGH 78578
	9	AAA24507.1	lipoprotein 28, partial		72	10781	1	Escherichia coli
	10	NP_670405.1	DL-methionine transporter substrate-binding subunit		72	/	1	Yersinia pestis KIM10+
	11	AAB86977.1	peptidoglycan associated lipoprotein		57	6732	1	Allochromatium vinosum DSM 180
	12	YP_003147027.1	peptidoglycan-associated lipoprotein		56	/	1	Kangiella koreensis DSM 16069
UR11	1	AAA24232.1	outer membrane protein II, partial		164	26114	1	Escherichia fergusonii
	2	NP_287228.1	acyl carrier protein	67, 67	134	8634	2	Escherichia coli O157:H7 str. EDL933
	3	ERE53009.1	30S ribosomal protein S2, partial		82	25562	1	Enterococcus gallinarum EGD-AAK12
	4	BAA32342.1	ribosomal protein S2		82	31289	1	Pseudomonas aeruginosa
	5	YP_001335792.1	murein lipoprotein		68	8381	1	Klebsiella pneumoniae subsp. pneumoniae MGH 78578
	6	P02938.1	RecName: Full=Major outer membrane lipoprotein; AltName: Full=Murein-lipoprotein; Flags: Precursor		68	8234	1	Serratia marcescens
	7	1BXW_A	Chain A, Outer Membrane Protein A (Ompa) Transmembrane Domain		67	18864	1	Escherichia coli BL21
	8	YP_001336542.1	autonomous glycyl radical cofactor GrcA		65	14234	1	Klebsiella pneumoniae subsp. pneumoniae MGH 78578
	9	P18953.2	RecName: Full=Autonomous glycyl radical cofactor		65	14366	1	Serratia liquefaciens
	10	CAA57795.1	enolase		63	46417	1	Escherichia coli K-12
	11	YP_001334138.1	adenylate kinase		61	23533	1	Klebsiella pneumoniae subsp. pneumoniae MGH 78578
	12	BAA14303.1	adenylate kinase		61	12103	1	Escherichia coli K-12
UR12	1	YP_002150599.1	outer membrane receptor	148, 148, 86	382	73933	3	Proteus mirabilis HI4320
	2	YP_002150354.1	peptidoglycan-associated outer membrane lipoprotein		275	18118	1	Proteus mirabilis HI4320
	3	YP_002152262.1	molecular chaperone GroEL		150	57615	1	Proteus mirabilis HI4320
	4	NP_927927.1	molecular chaperone DnaK	71, 71	142	68818	2	Photorhabdus luminescens subsp. laumondii TTO1
	5	WP_021710396.1	chaperone protein DnaK	71, 71	142	69029	2	Vibrio azureus
	6	YP_002150023.1	phosphoglycerate kinase		121	41197	1	Proteus mirabilis HI4320
	7	YP_858397.1	outer membrane receptor		72	71927	1	Aeromonas hydrophila subsp. hydrophila ATCC 7966
	8	YP_002152488.1	50S ribosomal protein L10		72	17640	1	Proteus mirabilis HI4320
UR13	1	YP_004593040.1	peptidoglycan-associated outer membrane lipoprotein		160	18865	1	Enterobacter aerogenes KCTC 2190
	2	1OEL_A	Chain A, Conformational Variability In The Refined Structure Of The Chaperonin Groel At 2.8 Angstrom Resolution		157	57031	1	Escherichia coli
	3	YP_001337379.1	elongation factor G		98	77494	1	Klebsiella pneumoniae subsp. pneumoniae MGH 78578
	4	NP_289887.1	elongation factor G		98	77532	1	Escherichia coli O157:H7 str. EDL933
	5	YP_001334507.1	DNA starvation/stationary phase protection protein Dps		89	18697	1	Klebsiella pneumoniae subsp. pneumoniae MGH 78578
	6	AAB49426.1	PexB, partial		89	5584	1	Salmonella enterica subsp. enterica serovar Typhimurium
	7	YP_001334652.1	outer membrane protein A		85	38021	1	Klebsiella pneumoniae subsp. pneumoniae MGH 78578
	8	P09146.1	RecName: Full=Outer membrane protein A; Flags: Precursor		85	37552	1	Klebsiella aerogenes
	9	YP_004393584.1	major outer membrane protein OmpAII		83	36565	1	Aeromonas veronii B565
	10	WP_021015441.1	Ferritin Dps family protein		74	/	1	Serratia sp. ATCC 39006
UR14	1	YP_001335792.1	murein lipoprotein		188	8381	1	Klebsiella pneumoniae subsp. pneumoniae MGH 78578
	2	P02938.1	RecName: Full=Major outer membrane lipoprotein; AltName: Full=Murein-lipoprotein; Flags: Precursor		188	8234	1	Serratia marcescens
	3	AAA24807.1	outer membrane protein II, partial	81, 59	140	25538	2	Enterobacter aerogenes
	4	YP_049963.1	major outer membrane lipoprotein		139	8396	1	Pectobacterium atrosepticum SCRI1043
	5	AHF77098.1	Major outer membrane lipoprotein		139	8327	1	Sodalis sp. HS1
	6	P24016.1	RecName: Full=Outer membrane protein A; AltName: Full=Outer membrane protein II		77	25648	1	Citrobacter freundii
UR15	1	NP_814526.1	cold shock domain-contain protein		94	7109	1	Enterococcus faecalis V583
	2	YP_001335792.1	murein lipoprotein		90	8381	1	Klebsiella pneumoniae subsp. pneumoniae MGH 78578
	3	P02938.1	RecName: Full=Major outer membrane lipoprotein; AltName: Full=Murein-lipoprotein; Flags: Precursor		90	8234	1	Serratia marcescens
	4	WP_005297706.1	glyceraldehyde-3-phosphate dehydrogenase		64	40057	1	Photobacterium damselae
	5	WP_009972002.1	hypothetical protein		59	4391	1	Burkholderia pseudomallei
	6	YP_002602369.1	protein FeoB1		55	/	1	Desulfobacterium autotrophicum HRM2
	7	ETT00120.1	TcdA/TcdB pore forming domain protein		55	/	1	Providencia alcalifaciens PAL-3
	8	NP_643074.1	PmbA protein		54	/	1	Xanthomonas axonopodis pv. citri str. 306
	9	WP_020491921.1	UDP-N-acetylenolpyruvoylglucosamine reductase		53	31795	1	Dehalobacter sp. FTH1
UR16	1	YP_049963.1	major outer membrane lipoprotein		212	8396	1	Pectobacterium atrosepticum SCRI1043
	2	AHF77098.1	Major outer membrane lipoprotein		212	8327	1	Sodalis sp. HS1
	3	YP_001335792.1	murein lipoprotein		161	8381	1	Klebsiella pneumoniae subsp. pneumoniae MGH 78578
	4	P02938.1	RecName: Full=Major outer membrane lipoprotein; AltName: Full=Murein-lipoprotein; Flags: Precursor		161	8234	1	Serratia marcescens
	5	YP_001463566.1	outer membrane porin protein C		102	40070	1	Escherichia coli E24377A
	6	ABS84845.1	translation elongation factor Tu		85	21970	1	Bacillus subtilis subsp. spizizenii ATCC 6633
	7	NP_299905.1	elongation factor Tu		85	42849	1	Xylella fastidiosa 9a5c
	8	0803214A	elongation factor Tu 59-263		85	22630	1	Escherichia coli
	9	NP_667815.1	elongation factor Tu		84	/	1	Yersinia pestis KIM10+
	10	AAQ96088.1	outer membrane protein II		62	17373	1	Klebsiella pneumoniae
	11	YP_003929643.1	hypothetical protein Pvag_pPag10133		61	/	1	Pantoea vagans C9-1
	12	YP_001337372.1	50S ribosomal protein L4		59	22100	1	Klebsiella pneumoniae subsp. pneumoniae MGH 78578
	13	NP_289880.1	50S ribosomal protein L4		59	22073	1	Escherichia coli O157:H7 str. EDL933

## Sheet: Human_proteins
			Supporting information data
			Supplementary Excel tables
			Human proteins
Sample		Accession	Protein_description	Mascot proteine score	∑ Peptide
UR1	1	BAG59381.1	unnamed protein product	140	1
	2	CAA34982.1	alpha-1 antitrypsin	99	1
	3	CAA26677.1	alpha-1-antitrypsin (aa 268-394)	70	1
	4	NP_000691.1	annexin A1	67	1
	5	740525A	lipoprotein Gln I	66	1
	6	2A01_A	Chain A, Crystal Structure Of Lipid-Free Human Apolipoprotein A-I	66	1
	7	CAA37116.1	unnamed protein product	55	1
Sample		Accession	Protein_description	Score	∑ Peptide
UR2	1	CAA23759.1	unnamed protein product	325, 200, 105	3
	2	2YRS_B	Chain B, Human Hemoglobin D Los Angeles: Crystal Structure	325	1
	3	AAN84548.1	beta globin chain variant	283	1
	4	1NQP_B	Chain B, Crystal Structure Of Human Hemoglobin E At 1.73 A Resolution	239	1
	5	AAY46275.1	beta globin chain	214	1
	6	AAY51976.1	hemoglobin beta chain	200	1
	7	AAA36799.1	uromodulin	170, 51	2
	8	CAA23749.1	alpha globin	152	1
	9	AAA51747.1	proapolipoprotein, partial	105, 76	2
	10	740525A	lipoprotein Gln I	100	1
	11	2A01_A	Chain A, Crystal Structure Of Lipid-Free Human Apolipoprotein A-I	100	1
	12	ACF16774.1	beta globin	85	1
	13	AAA35597.1	beta-globin	64	1
	14	1Y5K_B	Chain B, T-to-t(high) Quaternary Transitions In Human Hemoglobin: Betad99a Deoxy Low-salt (10 Test Sets)	64	1
					18
Sample		Accession	Protein_description	Score	∑ Peptide
UR3	1	AAA36799.1	uromodulin	121, 91	2
	2	NP_002956.1	protein S100-A9	101, 86	2
	3	AAB50880.1	anitubulin IgG1 kappa VL chain {N-terminal} [human, serum, immunocytic sarcom patient PER isolate, Peptide Partial, 219 aa]	89	1
	4	1COH_A	Chain A, Structure Of Haemoglobin In The Deoxy Quaternary State With Ligand Bound At The Alpha Haems	82	1
	5	CAA23759.1	unnamed protein product	75	1
	6	3KR3_L	Chain L, Crystal Structure Of Igf-Ii Antibody Complex	70	1
	7	BAG59381.1	unnamed protein product	65	1
	8	AAA51747.1	proapolipoprotein, partial	55	1
	9	740525A	lipoprotein Gln I	54	1
					11
Sample		Accession	Protein_description	Score	∑ Peptide
UR4	1	NP_002956.1	protein S100-A9	89	1
	2	CAA68390.1	unnamed protein product	61	1
	3	AAH13767.1	VASN protein	58	1
					3
Sample		Accession	Protein_description	Score	∑ Peptide
UR5	1	AAA36799.1	uromodulin	148, 74	2
	2	CAA23749.1	alpha globin	52	1
					3
Sample		Accession	Protein_description	Score	∑ Peptide
UR6	1	AAA51747.1	proapolipoprotein, partial	475, 344, 195	3
	2	740525A	lipoprotein Gln I	354, 234, 195, 69	4
	3	AAB59495.1	alpha-1-antitrypsin	132, 59	2
	4	1OR3_A	Chain A, Apolipoprotein E3 (Apoe3), Trigonal Truncation Mutant 165	131	1
	5	AAA51547.1	alpha-1-antitrypsin precursor	104	1
	6	AAB59372.1	apolipoprotein C-III	91	1
	7	AAB59518.1	apolipoprotein E	71, 60	2
	8	CAA23749.1	alpha globin	65	1
	9	1506383A	apolipoprotein E mutant E3K	52	1
					16
Sample		Accession	Protein_description	Score	∑ Peptide
UR7	1	CAA23749.1	alpha globin	95	1
	2	NP_002956.1	protein S100-A9	91	1
	3	2CMR_L	Chain L, Crystal Structure Of The Hiv-1 Neutralizing Antibody D5 Fab Bound To The Gp41 Inner-Core Mimetic 5-Helix	84	1
	4	CAA23759.1	unnamed protein product	70	1
	5	3KR3_L	Chain L, Crystal Structure Of Igf-Ii Antibody Complex	66	1
	6	4JFY_A	Chain A, Apo Structure Of Phosphotyrosine (pyab) Scaffold	77	1
					6
Sample		Accession	Protein_description	Score	∑ Peptide
UR8	1	AAM13690.1	delta 2-isopentenyl pyrophosphate transferase-like protein	69	1
Sample		Accession	Protein_description	Score	∑ Peptide
UR9	1	AAA51747.1	proapolipoprotein, partial	212, 87	2
	2	CAA34982.1	alpha-1 antitrypsin	68	1
	3	AAA36799.1	uromodulin	50	1
					4
Sample		Accession	Protein_description	Score	∑ Peptide
UR10	1	AAA36799.1	uromodulin	119	1
	2	A37927	Ig kappa chain C region (allotype Inv(1,2)) - human (fragment)	114	1
	3	3KR3_L	Chain L, Crystal Structure Of Igf-Ii Antibody Complex	114	1
	4	NP_002956.1	protein S100-A9	86	1
	5	CAA33438.1	unnamed protein product	61	1
	6	CAA40416.1	histone H2A.2	57	1
	7	740525A	lipoprotein Gln I	56	1
	8	CAA68390.1	unnamed protein product	44	1
	9	CAA37116.1	unnamed protein product	42	1
					9
Sample		Accession	Protein_description	Score	∑ Peptide
UR11	1	AAA36799.1	uromodulin	119	1
	2	AAF00488.1	hemoglobin beta subunit variant	43	1
					2
Sample		Accession	Protein_description	Score	∑ Peptide
UR12	1	1AU8_A	Chain A, Human Cathepsin G	71	1
	2	AAB57795.1	lactoferrin	53	1
	3	NP_001148.1	annexin A11 isoform 1	41	1
					3
Sample		Accession	Protein_description	Score	∑ Peptide
UR13	1	AAA36799.1	uromodulin	149	1
	2	NP_002956.1	protein S100-A9	85	1
					2
Sample		Accession	Protein_description	Score	∑ Peptide
UR14	1	CAA23759.1	unnamed protein product	104, 69	2
	2	CAA23749.1	alpha globin	99, 77	2
					4
Sample		Accession	Protein_description	Score	∑ Peptide
UR15	1	CAA23759.1	unnamed protein product	244, 138, 119	3
	2	AAF00488.1	hemoglobin beta subunit variant	220	1
	3	BAA33580.1	anti-HBsAg immunoglobulin Fab kappa chain	123	1
	4	CAA23749.1	alpha globin	112	1
	5	AAY46275.1	beta globin chain	104	1
	6	AAA35597.1	beta-globin	104, 71	2
	7	3KR3_L	Chain L, Crystal Structure Of Igf-Ii Antibody Complex	103	1
	8	AAA36799.1	uromodulin	66	1
	9	H7BZ55.3	RecName: Full=Putative ciliary rootlet coiled-coil protein-like 3 protein	39	1
					12
Sample		Accession	Protein_description	Score	∑ Peptide
UR16	1	protein S100-A9	NP_002956.1	97, 68	2
